# Supplementary material for: Multichannel nitrogen-doped carbon fiber confined Fe3C nanoparticles for efficient electroreduction of nitrate
Source: Royal Society of Chemistry journal article supplement (doi:10.1039/d4ey00016a), 2024-01-01
Supplement: d4ey00016a1.pdf [file d4ey00016a1.pdf]

## Supporting Information

### **Multichannel Nitrogen-doped Carbon Fibers confined Fe<sub>3</sub>C Nanoparticles for Efficient Electroreduction of Nitrate**

Fangzhou Zhang,<sup>a</sup> Zhangsheng Shi,<sup>c</sup> Junliang Chen,<sup>a</sup> Hongxia Luo,<sup>a</sup> Jun Chen,<sup>\*b</sup> and Jianping Yang<sup>\*a</sup>

<sup>a</sup>State Key Laboratory for Modification of Chemical Fibers and Polymer Materials, College of Materials Science and Engineering, Donghua University, Shanghai 201620, P. R. China

<sup>b</sup>ARC Centre of Excellence for Electromaterials Science, Intelligent Polymer Research Institute (IPRI), Australian Institute of Innovative Materials (AIIM), University of Wollongong, Wollongong, NSW 2522, Australia

<sup>c</sup>Department of Chemistry, City University of Hong Kong, Hong Kong SAR, China

E-mail: junc@uow.edu.au; jianpingyang@dhu.edu.cn

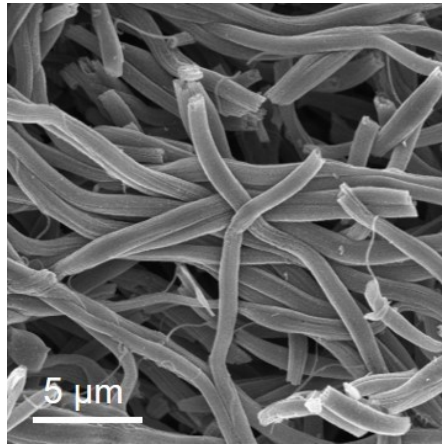

Fig. S1. SEM image of  $\text{Fe}_3\text{C}/\text{MNCFs-800}$ .

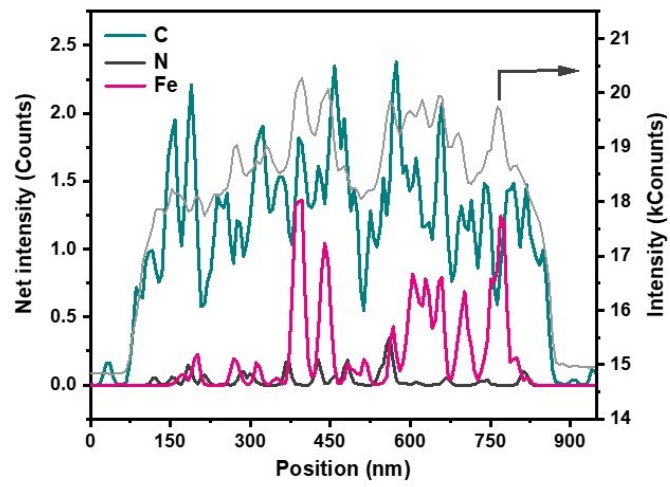

Fig. S2. Line scanning of Fe<sub>3</sub>C/MNCFs-800.

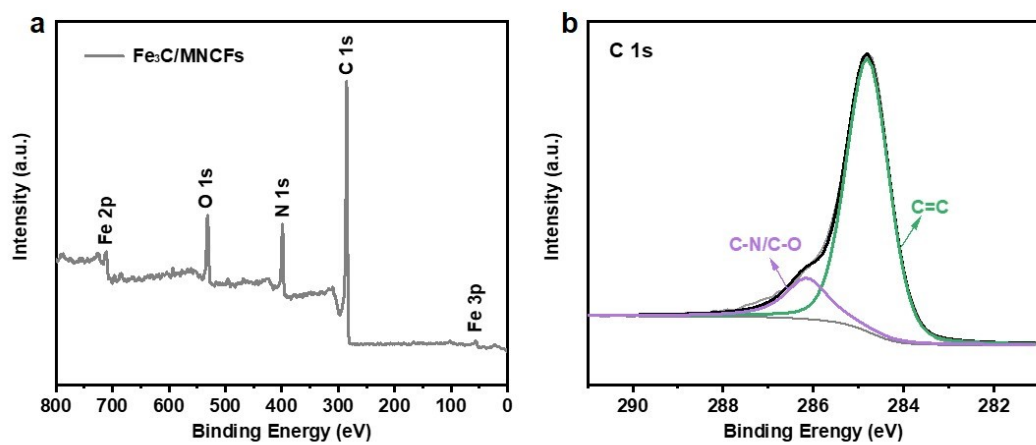

Fig. S3. a) XPS survey spectrum and b) high-resolution C 1s spectrum of Fe<sub>3</sub>C/MNCFs-800.

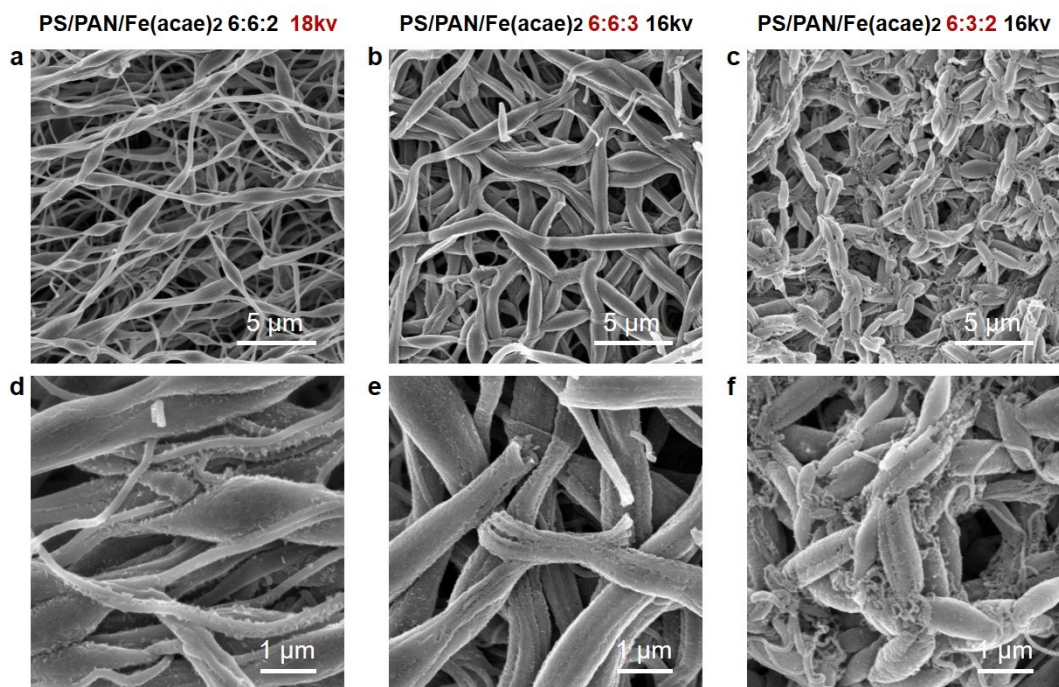

Fig. S4. SEM images of Fe<sub>3</sub>C/MNCFs-800. a, d) The voltage is 18 kv. b, e) The mass ratio of PS/PAN/Fe(acac)<sub>3</sub> is 6:6:3. c, f) The mass ratio of PS/PAN/Fe(acac)<sub>3</sub> is 6:3:2.

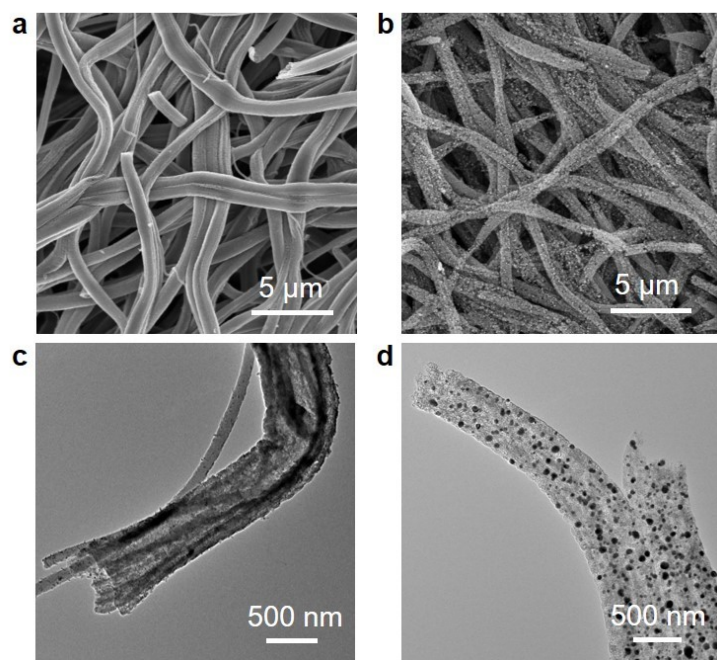

Fig. S5. a) SEM and c) TEM images of Fe<sub>3</sub>C/MNCFs-700. b) SEM and d) TEM images of Fe<sub>3</sub>C/MNCFs-900.

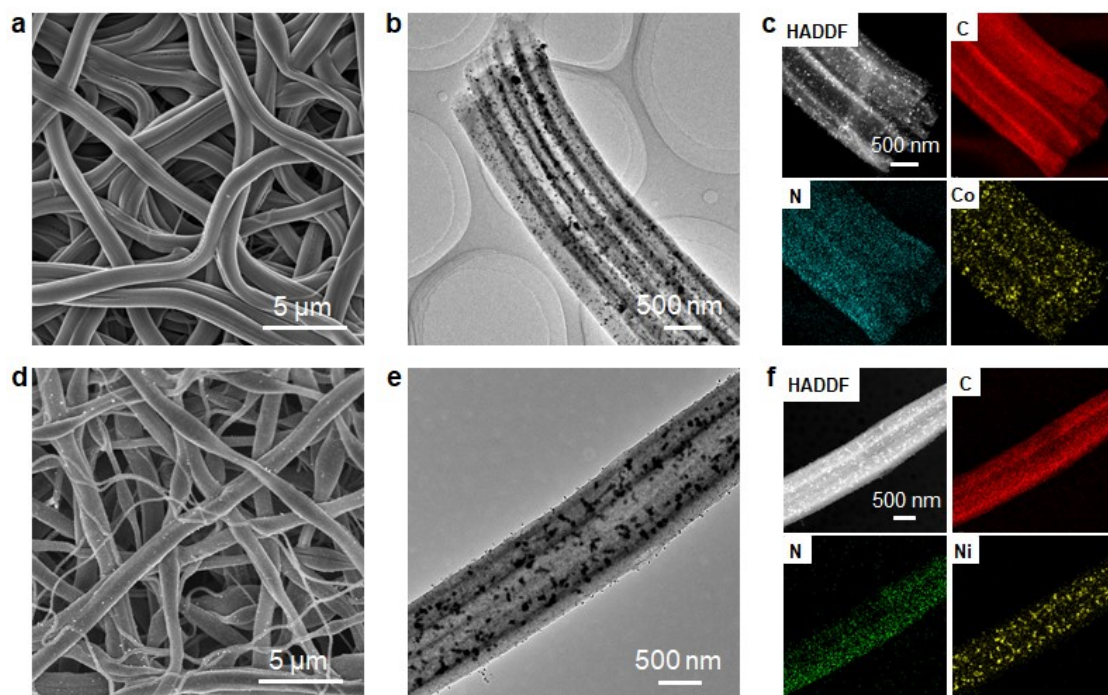

Fig. S6. a) SEM, b) TEM, and c) HAADF-STEM images and elemental mapping of Co/MNCFs-800. d) SEM, e) TEM, and f) HAADF-STEM images and elemental mapping of Ni/MNCFs-800.

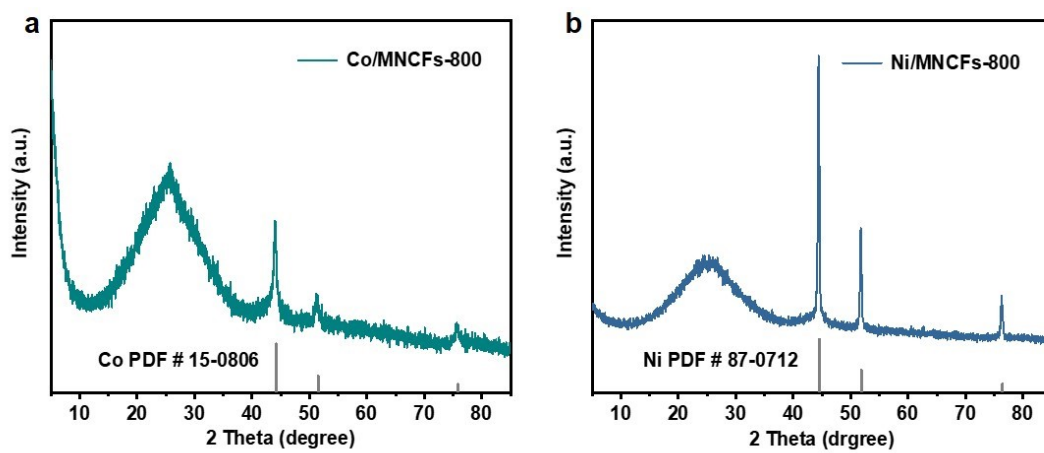

Fig. S7. XRD patterns of a) Co/MNCFs-800 and b) Ni/MNCFs-800.



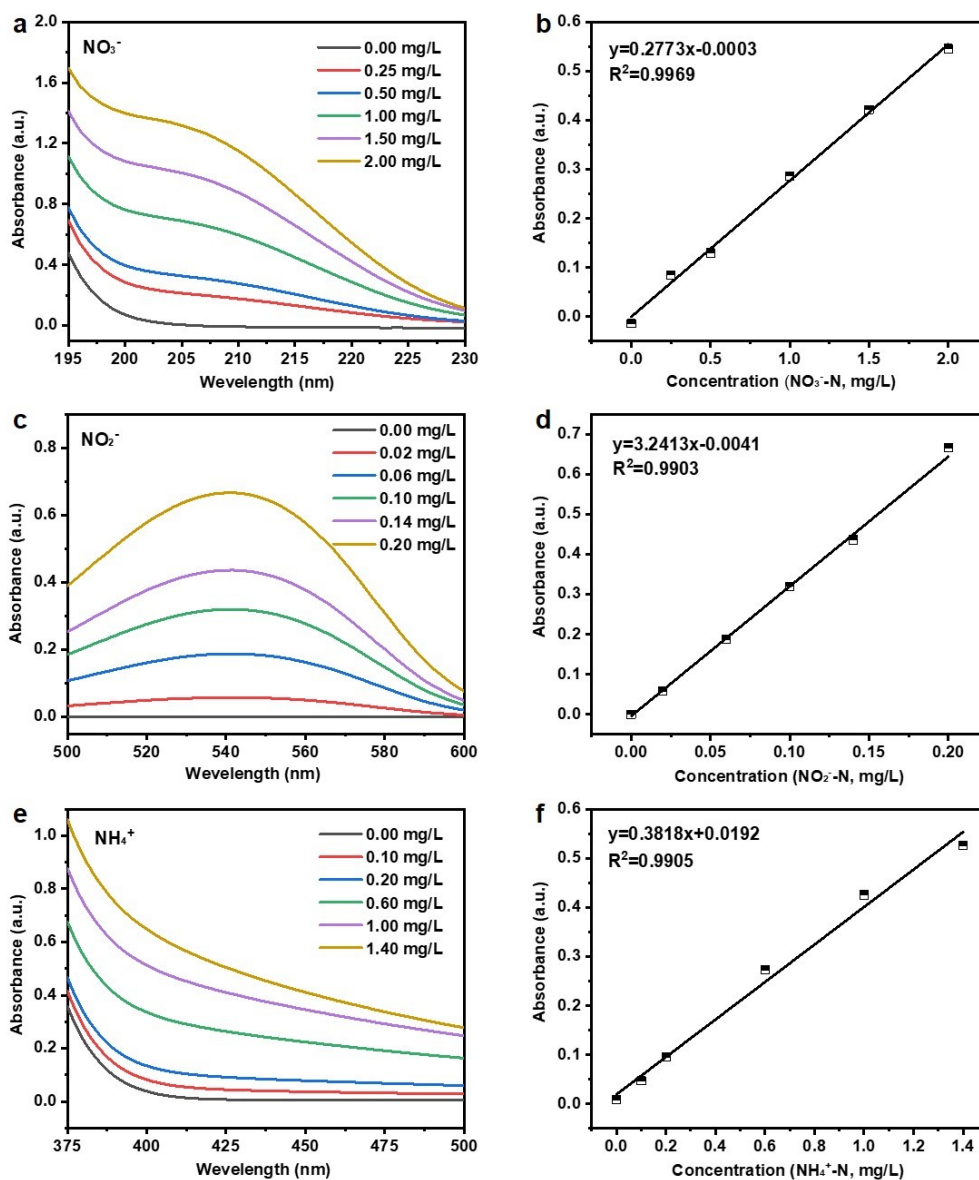

Fig. S8. The UV-vis absorbance spectra of a)  $\text{NO}_3^-$ -N, c)  $\text{NO}_2^-$ -N and e)  $\text{NH}_4^+$ -N, and their concentration-absorbance calibration curves of b)  $\text{NO}_3^-$ -N, d)  $\text{NO}_2^-$ -N, and f)  $\text{NH}_4^+$ -N. The calibration curves all showed good linearity.

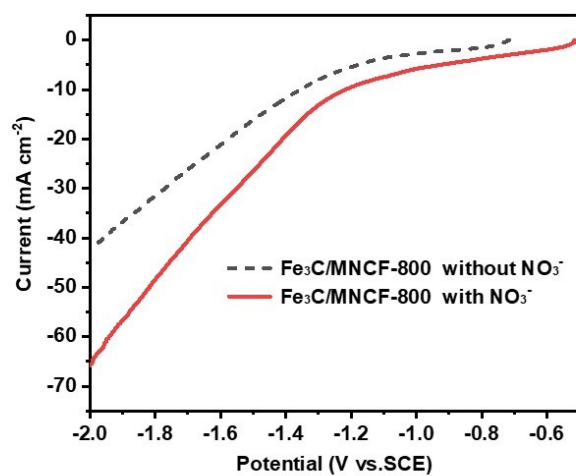

Fig. S9. LSV curves for the Fe<sub>3</sub>C/MNCFs-800 in 0.1M Na<sub>2</sub>SO<sub>4</sub> with and without 100 ppm NaNO<sub>3</sub> addition.

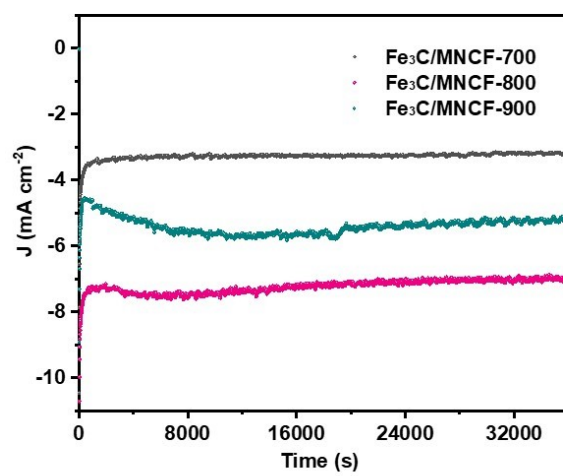

Fig. S10. The chronoamperometry curves of Fe<sub>3</sub>C/MNCFs-x at -1.3 V vs. SCE.

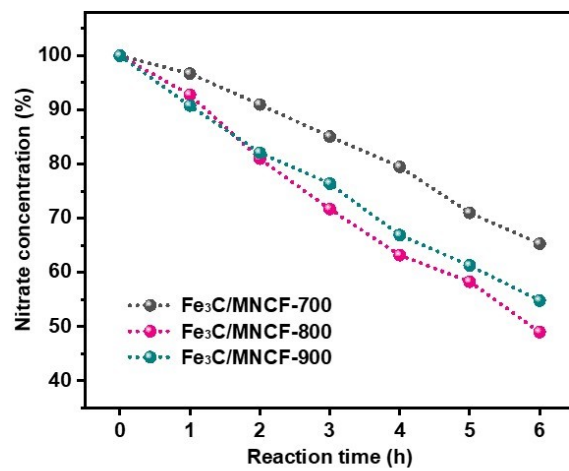

Fig. S11. The change of nitrate residual during the NO<sub>3</sub>RR process on Fe<sub>3</sub>C/MNCFs-x.

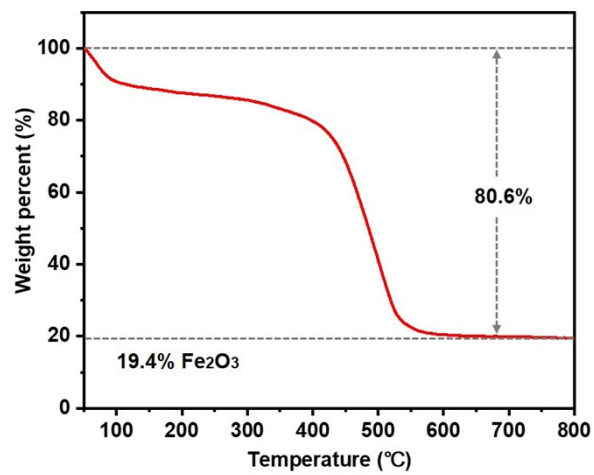

Fig. S12. TGA curves of Fe<sub>3</sub>C/MNCFs-800.

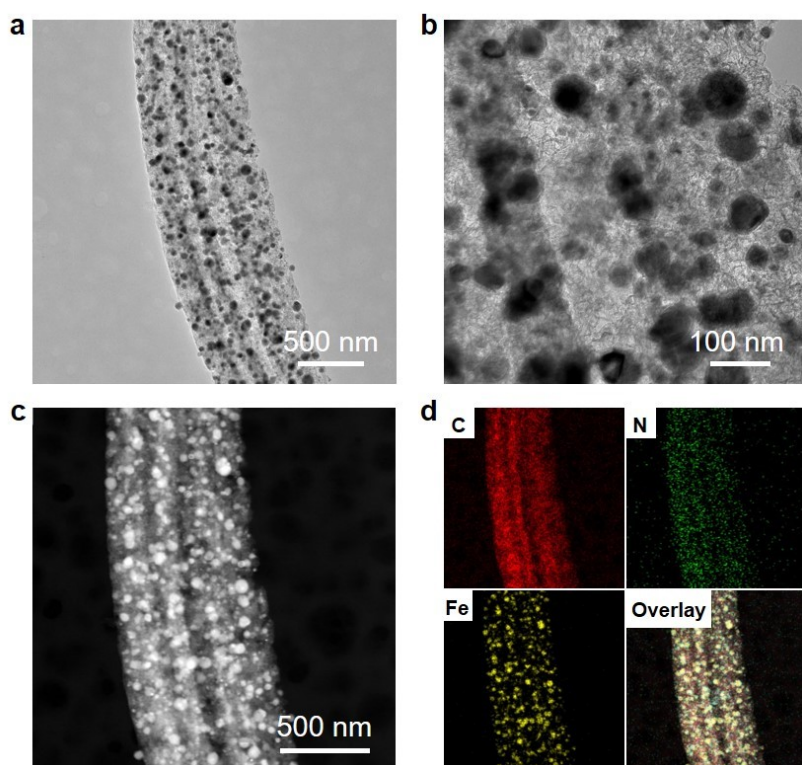

Fig. S13. a, b) TEM images, c) HAADF-STEM and d) corresponding elemental mapping images of Fe<sub>3</sub>C/MNCFs-800 after 15 cycles (24 hours per cycle).

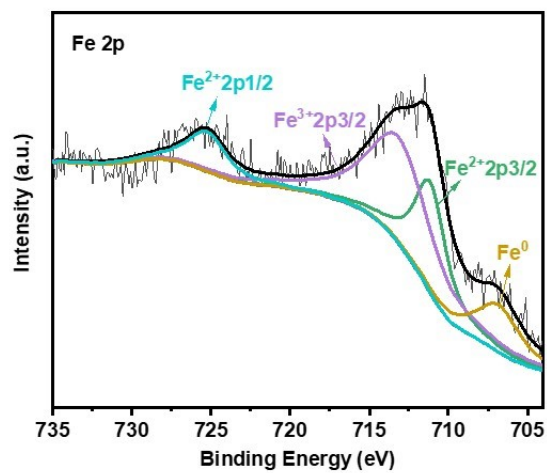

Fig. S14. Fe 2p of Fe<sub>3</sub>C/MNCFs-800 after electrocatalytic nitrate reduction.

Table S1. Comparison of this work with previously reported Fe-based electrocatalysts.

| Materials                 | Electrolyte                                          | Reaction time (h) | NO <sub>3</sub> <sup>-</sup> Conversion (%) | N <sub>2</sub> selectivity (%) | Nitrate removal capacity (mg N/g Fe) | Refs.     |
|---------------------------|------------------------------------------------------|-------------------|---------------------------------------------|--------------------------------|--------------------------------------|-----------|
| Fe@Gnc                    | 0.02M Na <sub>2</sub> SO <sub>4</sub> +0.02M NaCl    | 24                | 72.7                                        | 99.6                           | /                                    | 34        |
| FeNi/g-mesoC/NF           | 0.05 M Na <sub>2</sub> SO <sub>4</sub> +0.02 M NaCl, | 24                | 88                                          | 100                            | 816                                  | 35        |
| Fe/Fe <sub>3</sub> C-NCNF | 0.01M Na <sub>2</sub> SO <sub>4</sub> +0.03M NaCl    | 24                | ~60                                         | 96                             | 1787                                 | 36        |
| Fe/GF                     | 0.03M Na <sub>2</sub> SO <sub>4</sub> +0.01M NaCl    | 24                | 67.7                                        | 96.6                           | /                                    | 37        |
| B-Fe NCs                  | 0.02M Na <sub>2</sub> SO <sub>4</sub> +0.02M NaCl    | 24                | 80                                          | 99                             | /                                    | 38        |
| CL-Fe@C                   | 0.1M Na <sub>2</sub> SO <sub>4</sub> +0.02M NaCl     | 24                | 42                                          | 98                             | 1816                                 | 39        |
| RL-Fe <sub>2</sub> N@NC   | 0.02M Na <sub>2</sub> SO <sub>4</sub> +0.02M NaCl    | 24                | 86                                          | 96                             | /                                    | 40        |
| Fe <sub>3</sub> C/MNCFs   | 0.1M Na <sub>2</sub> SO <sub>4</sub> +0.02M NaCl     | 24                | 90.9                                        | 99.53                          | 4031                                 | This work |
